# Supplementary material for: High Sodium Intake, as Assessed by Urinary Sodium Excretion, Is Associated with Nonalcoholic Fatty Liver Disease or Sarcopenia
Source: PubMed Central journal article supplement — Gut Liver. 2022 Nov 1;17(3):456–65. doi: 10.5009/gnl220133 (PMC10191796; doi:10.5009/gnl220133), 2022-11-01
Supplement: gnl-17-3-456-supple.pdf [file gnl-17-3-456-supple.pdf]

**Supplementary Table 1.** Two-Way Analysis of Variance of NAFLD and High Sodium Intake for Determination of Muscle Mass

| Variable                   | SS     | df | MS     | F     | p-value |
|----------------------------|--------|----|--------|-------|---------|
| NAFLD                      | 449.96 | 1  | 449.96 | 22.41 | <0.001  |
| 24-hour urinary sodium     | 581.15 | 2  | 292.07 | 14.55 | <0.001  |
| NAFLD*24-hr urinary sodium | 469.75 | 2  | 234.88 | 11.70 | <0.001  |

NAFLD, nonalcoholic fatty liver disease; SS, sum-of-squares; df, degrees of freedom; MS, mean square.

\*Interaction.
